# Supplementary material for: Epidemiological and Histopathological Investigation of Sarcocystis spp. in Slaughtered Dromedary Camels (Camelus dromedarius) in Egypt
Source: MDPI journal article supplement (doi:10.3390/vetsci7040162), 2020-10-27
Supplement: s1 [file s1]

## Diaphragm

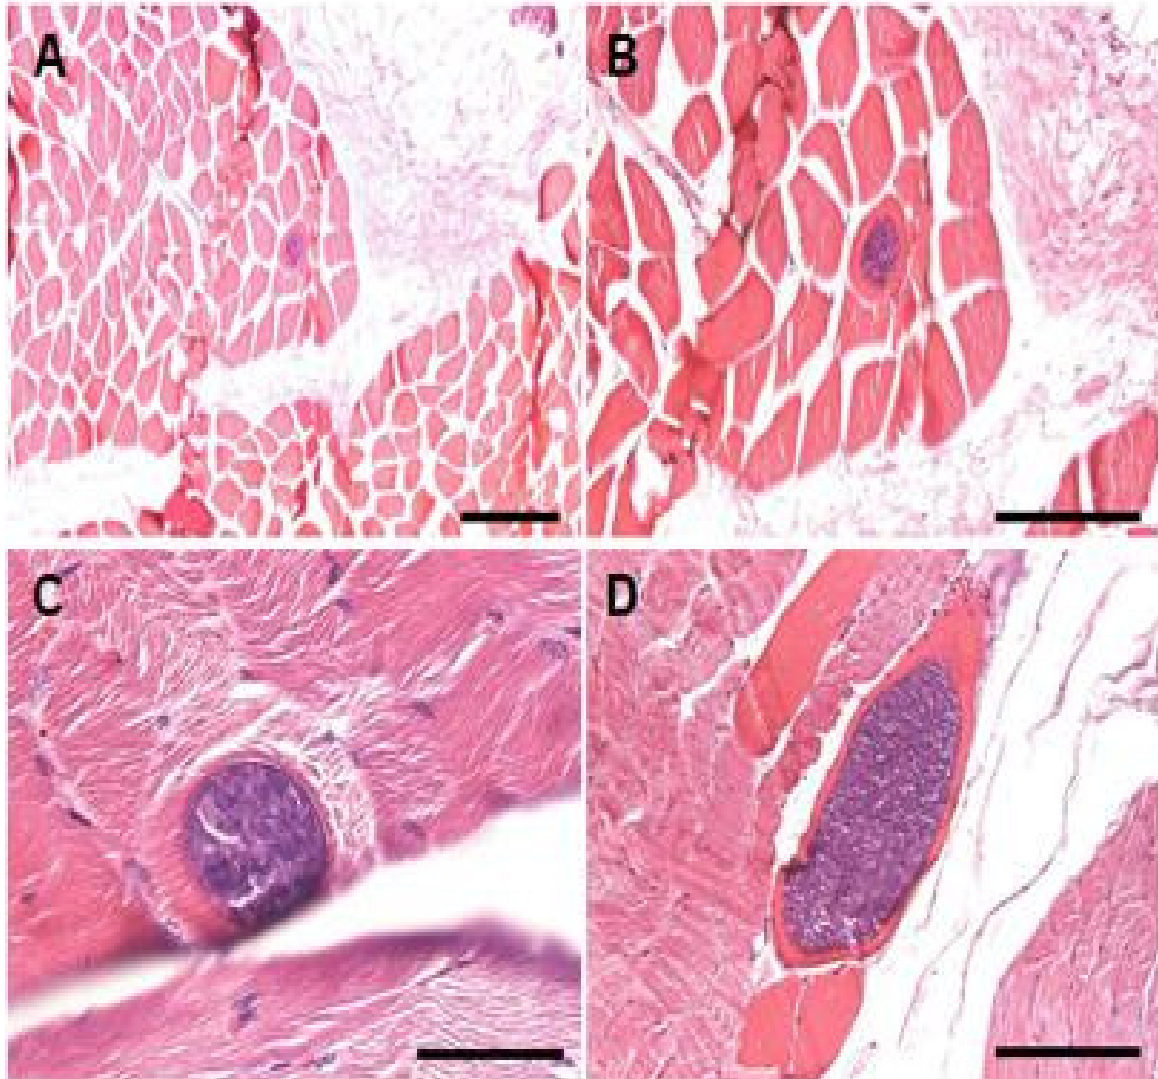

**Figure S1.** Photomicrograph of *Sarcocystis* in the diaphragm. Encysted parasites in the muscle fibers of the diaphragm without inflammatory cells infiltration (A-D). Hematoxylin and eosin stain. Bar A = 100  $\mu$ M. Bars B-D = 50  $\mu$ M.

# Heart

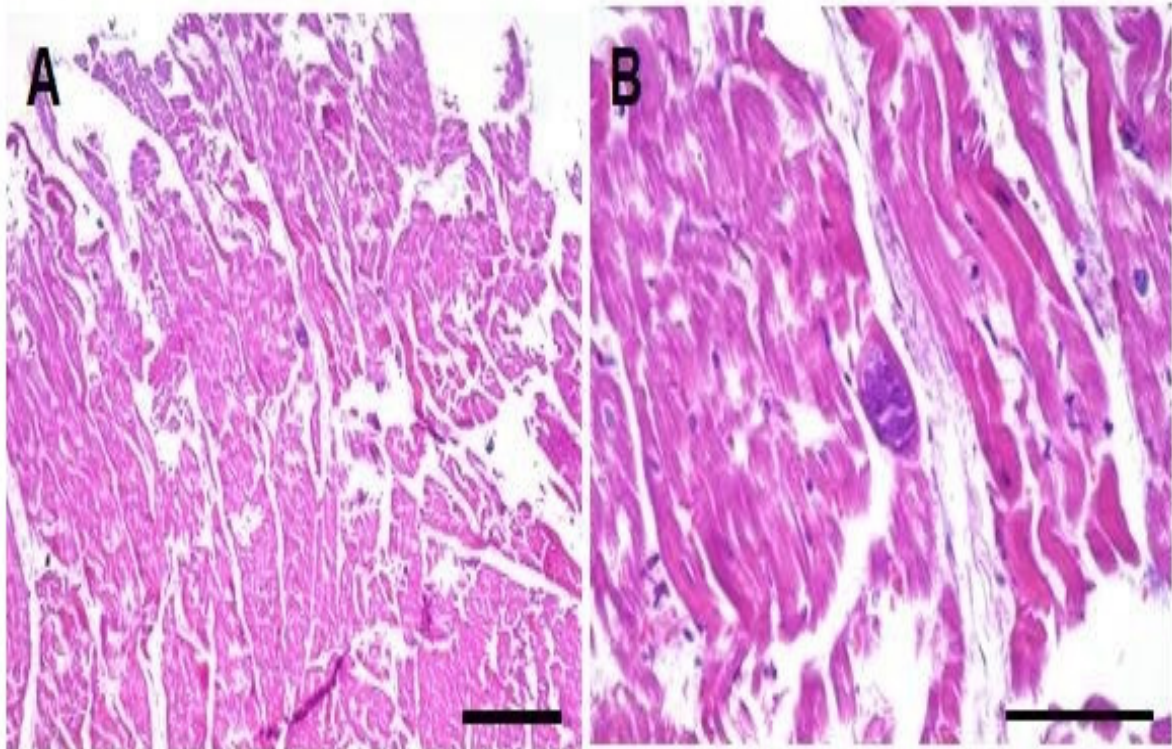

**Figure S2.** Photomicrograph of *Sarcocystis* in the heart. Encysted parasite in the muscle fibers of the heart without inflammatory cells infiltration (A and B). Hematoxylin and eosin stain. Bar A = 100  $\mu$ M. Bar B = 50  $\mu$ M.
